# Supplementary material for: Formation of nanoneedle Cu(0)/CuS nanohybrid thin film by the disproportionation of a copper(i) complex at an oil–water interface and its application for dye degradation
Source: Royal Society of Chemistry journal article supplement (doi:10.1039/c6ra14995b), 2016-01-01
Supplement: c6ra14995b1.pdf [file c6ra14995b1.pdf]

Electronic Supplementary Information (ESI)

**Formation of nanoneedle Cu(0)/CuS nanohybrid thin film by the disproportionation of a copper(I) complex at oil–water interface and its application for dye degradation**

S. Jafar Hoseini\* and Roghayeh Hashemi Fath

Department of Chemistry, Faculty of Sciences, Yasouj University, Yasouj 7591874831, Iran

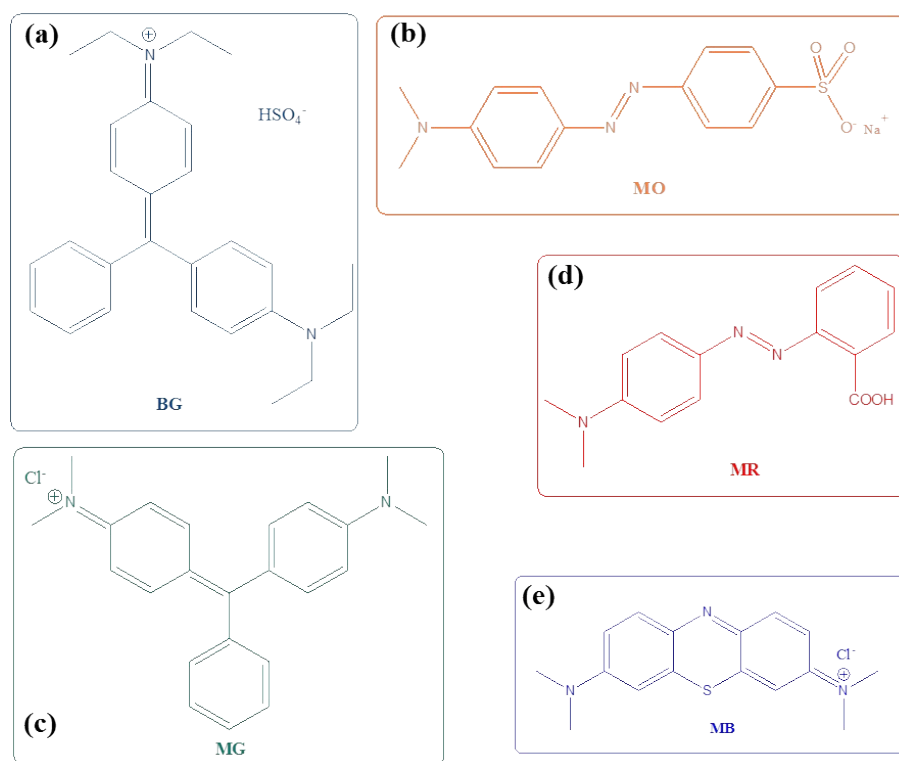

**Fig. S1** Structure of the dye molecules (a) BG, (b) MO, (c) MG, (d) MR and (e) MB.

\* Corresponding author: E-mail: [jhosseini@yu.ac.ir](mailto:jhosseini@yu.ac.ir), [sjhoseini54@yahoo.com](mailto:sjhoseini54@yahoo.com), Fax: +98 74 33342172; Tel: +98 74 33223048.

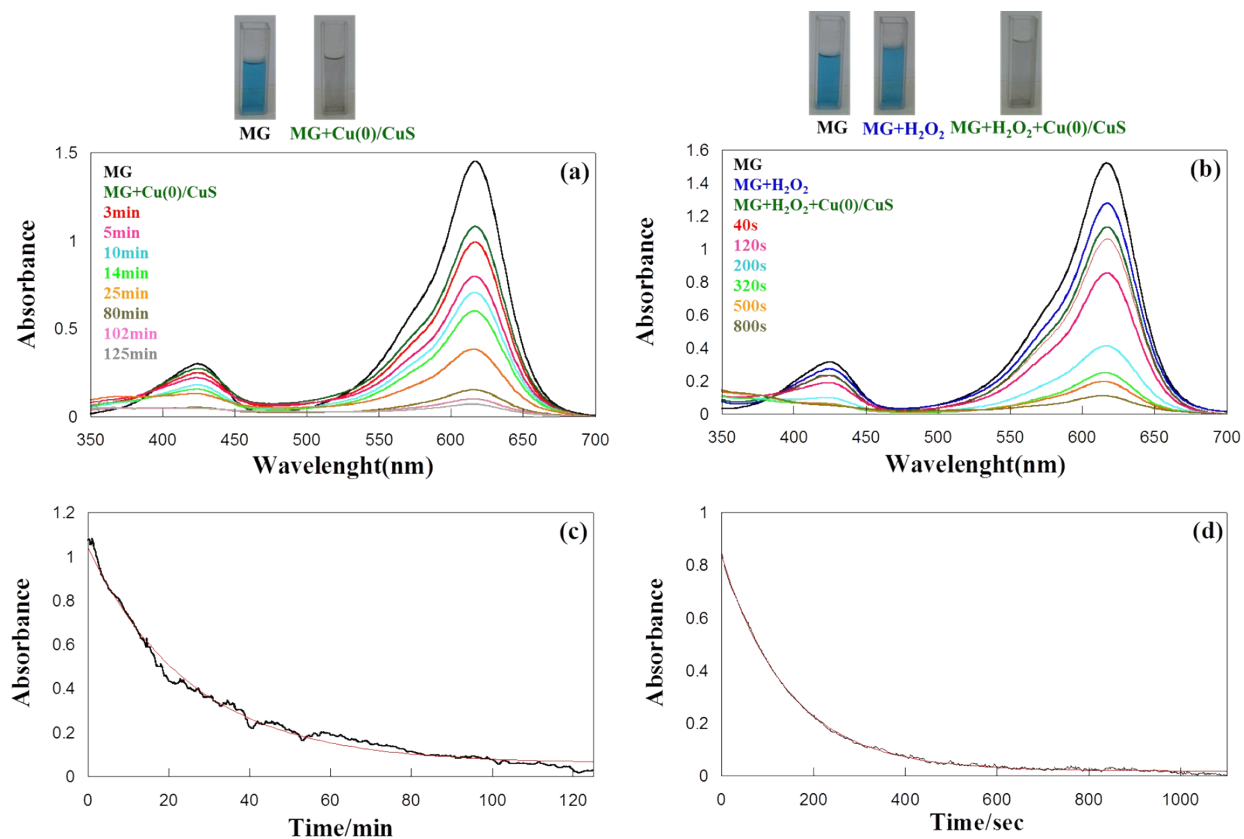

**Fig. S2** Degradation of MG dye (a) plot of absorbance (A) vs wavelength and the inset image indicates the decolorisation reaction in the absence of H<sub>2</sub>O<sub>2</sub>, (b) plot of absorbance (A) vs wavelength and the inset image indicates the decolorisation reaction in the presence of H<sub>2</sub>O<sub>2</sub>, (c) plot of absorbance (A) vs time (t) in the absence of H<sub>2</sub>O<sub>2</sub> and (d) plot of absorbance (A) vs time (t) in the presence of H<sub>2</sub>O<sub>2</sub>.

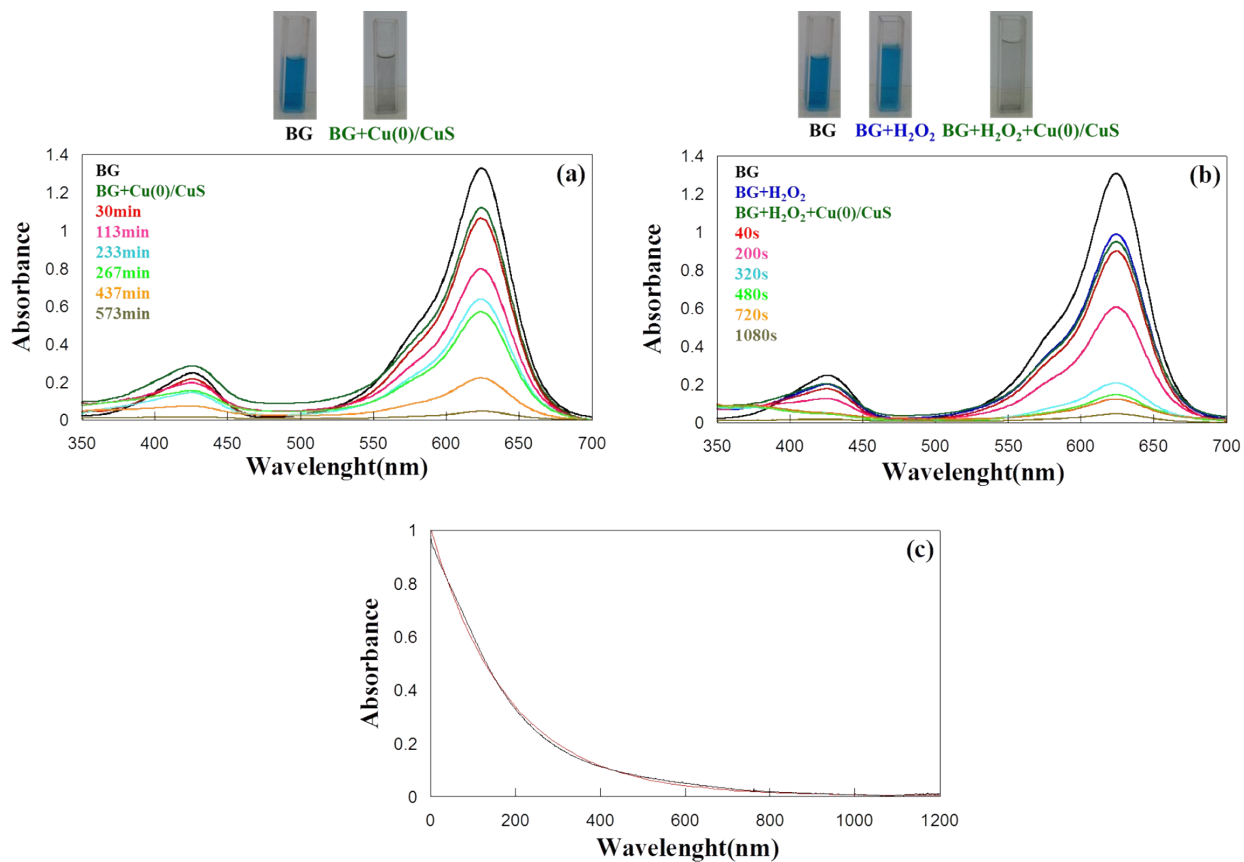

**Fig. S3** Degradation of BG dye (a) plot of absorbance (A) vs wavelength and the inset image indicates the decolorisation reaction in the absence of H<sub>2</sub>O<sub>2</sub>, (b) plot of absorbance (A) vs wavelength and the inset image indicates the decolorisation reaction in the presence of H<sub>2</sub>O<sub>2</sub> and (c) plot of absorbance (A) vs time (t) in the presence of H<sub>2</sub>O<sub>2</sub>.

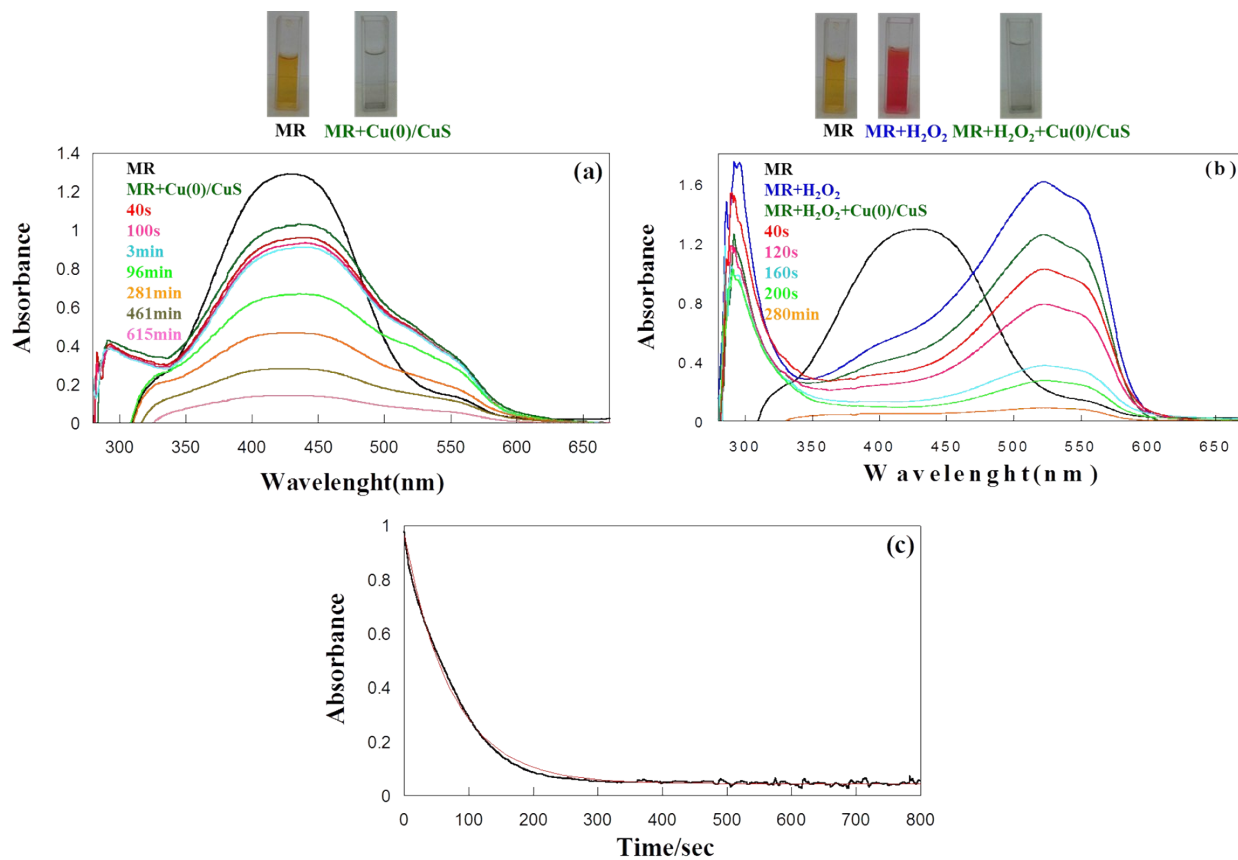

**Fig. S4** Degradation of MR dye (a) plot of absorbance (A) vs wavelength and the inset image indicates the decolorisation reaction in the absence of H<sub>2</sub>O<sub>2</sub>, (b) plot of absorbance (A) vs wavelength and the inset image indicates the decolorisation reaction in the presence of H<sub>2</sub>O<sub>2</sub> and (c) plot of absorbance (A) vs time (t) in the presence of H<sub>2</sub>O<sub>2</sub>.

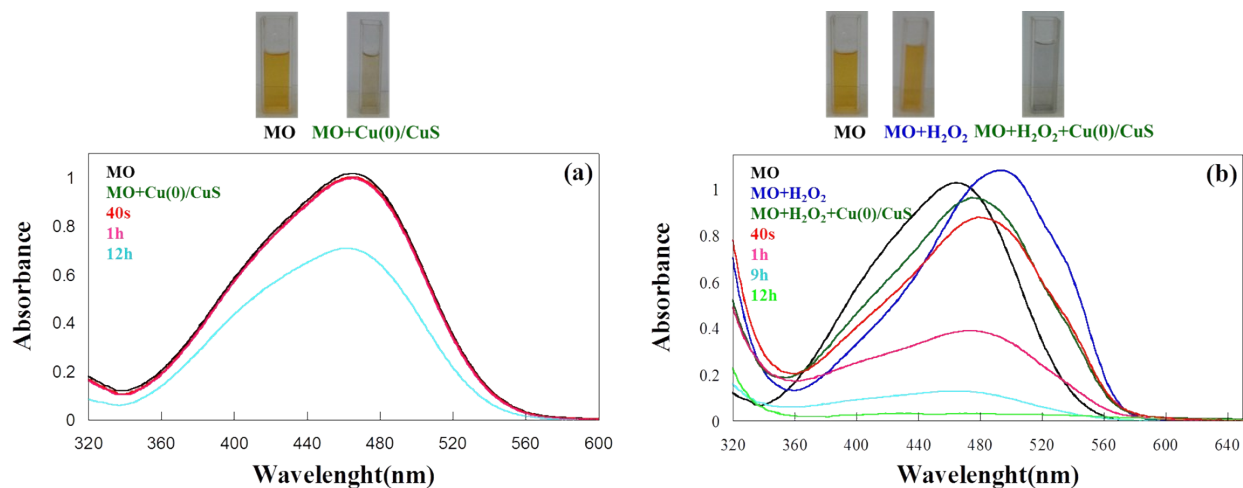

**Fig. S5** Degradation of MO dye (a) plot of absorbance (A) vs wavelength and the inset image indicates the decolorisation reaction in the absence of  $H_2O_2$  and (b) plot of absorbance (A) vs wavelength and the inset image indicates the decolorisation reaction in the presence of  $H_2O_2$ .
